# Supplementary material for: Reading Mammal Diversity from Flies: The Persistence Period of Amplifiable Mammal mtDNA in Blowfly Guts (Chrysomya megacephala) and a New DNA Mini-Barcode Target
Source: PubMed Central journal article supplement (PMC4405593; doi:10.1371/journal.pone.0123871), 2015-04-21
Supplement: pone.0123871.s001.pdf [file pone.0123871.s001.pdf]

Dataset S1. List of 41 mammal species from Malaysia for comparison of amplification

success between primer pairs, Uni-Mini-bar F/RonPing and Uni-Mini-bar F/Uni-Mini-bar R

and BOLD Process ID numbers for those sequenced after troubleshooting.

| Specimen Number | Species                          | Uni-Mini-bar F/<br>Uni-Mini-bar R<br>1 <sup>st</sup> Pass | Uni-Mini-bar F/<br>RonPing<br>1 <sup>st</sup> Pass | Uni-Mini-bar F/<br>RonPing<br>Troubleshooting |
|-----------------|----------------------------------|-----------------------------------------------------------|----------------------------------------------------|-----------------------------------------------|
| BT31B           | <i>Balionycteris maculata</i>    | /                                                         | /                                                  | RONP010-14                                    |
| P16B            | <i>Bandicota indica</i>          | /                                                         | /                                                  | RONP029-14                                    |
| BF5A            | <i>Bos taurus</i>                | ×                                                         | ×                                                  | RONP001-14                                    |
| DOGB            | <i>Canis lupus familiaris</i>    | ×                                                         | ×                                                  | RONP031-14                                    |
| GOATB           | <i>Capra hircus</i>              | /                                                         | /                                                  | RONP050-14                                    |
| BGM19A          | <i>Chironax melanocephalus</i>   | ×                                                         | /                                                  | RONP002-14                                    |
| BK28B           | <i>Cynopterus brachyotis</i>     | /                                                         | /                                                  | RONP049-14                                    |
| BT4B            | <i>Cynopterus horsefieldii</i>   | ×                                                         | /                                                  | RONP040-14                                    |
| BK4B            | <i>Cynopterus JLE sp.A</i>       | ×                                                         | /                                                  | RONP012-14                                    |
| BT73B           | <i>Eonycteris spelaea</i>        | /                                                         | /                                                  | RONP025-14                                    |
| CATB            | <i>Felis catus</i>               | /                                                         | /                                                  | RONP027-14                                    |
| BT64A           | <i>Glischropus tylopus</i>       | /                                                         | /                                                  | RONP009-14                                    |
| TI13B           | <i>Hipposideros bicolor</i> 131  | /                                                         | ×                                                  | RONP033-14                                    |
| T25B            | <i>Hipposideros cervinus</i>     | ×                                                         | /                                                  | RONP026-14                                    |
| T27B            | <i>Hipposideros cf. larvatus</i> | /                                                         | /                                                  | RONP015-14                                    |
| BK1B            | <i>Hipposideros diadema</i>      | ×                                                         | ×                                                  | RONP034-14                                    |
| BT30B           | <i>Hipposideros doriae</i>       | /                                                         | /                                                  | RONP042-14                                    |
| BK13B           | <i>Kerivoula cf. hardwickii</i>  | /                                                         | /                                                  | RONP019-14                                    |
| BT25B           | <i>Kerivoula minuta</i>          | /                                                         | /                                                  | RONP039-14                                    |
| BT44B           | <i>Kerivoula papillosa</i>       | /                                                         | /                                                  | RONP014-14                                    |
| BT17A           | <i>Kerivoula pellucida</i>       | /                                                         | /                                                  | RONP004-14                                    |
| PING14B         | <i>Leopoldamys sabanus</i>       | /                                                         | /                                                  | RONP035-14                                    |
| BK12B           | <i>Macroglossus sobrinus</i>     | /                                                         | /                                                  | RONP018-14                                    |
| PING15B         | <i>Maxomys surifer</i>           | /                                                         | /                                                  | RONP036-14                                    |
| BK22A           | <i>Megaderma lyra</i>            | /                                                         | /                                                  | RONP005-14                                    |
| BT59B           | <i>Megaderma spasma</i>          | ×                                                         | ×                                                  | ×                                             |
| BT50B           | <i>Megaerops ecaudatus</i>       | /                                                         | /                                                  | RONP041-14                                    |
| T74B            | <i>Murina aenea</i>              | /                                                         | /                                                  | RONP016-14                                    |
| BT10B           | <i>Murina cyclotis</i>           | ×                                                         | /                                                  | RONP013-14                                    |
| BK32B           | <i>Murina suilla</i>             | ×                                                         | ×                                                  | ×                                             |
| AF1B            | <i>Mus musculus</i>              | /                                                         | /                                                  | RONP051-14                                    |
| BT2B            | <i>Myotis muricola</i>           | /                                                         | /                                                  | RONP037-14                                    |
| PING18A         | <i>Rattus andamanensis</i>       | /                                                         | /                                                  | RONP006-14                                    |
| PING3B          | <i>Rattus tiomanicus</i>         | /                                                         | /                                                  | RONP038-14                                    |
| BT1B            | <i>Rhinolophus acuminatus</i>    | ×                                                         | ×                                                  | ×                                             |
| BK49B           | <i>Rhinolophus affinis</i>       | /                                                         | /                                                  | RONP021-14                                    |
| BT34B           | <i>Rhinolophus trifolius</i>     | ×                                                         | ×                                                  | ×                                             |
| BK67B           | <i>Rhinolophus yunanensis</i>    | /                                                         | /                                                  | RONP011-14                                    |
| Z2B             | <i>Suncus murinus</i>            | /                                                         | /                                                  | RONP032-14                                    |
| WB8B            | <i>Sus scrofa</i>                | /                                                         | /                                                  | RONP008-14                                    |
| PING11B         | <i>Tupaia glis</i>               | /                                                         | ×                                                  | ×                                             |
|                 | Total                            | 29/41 (71%)                                               | 32/41 (78%)                                        | 36/41 (89%)                                   |
