# Supplementary material for: Reading Mammal Diversity from Flies: The Persistence Period of Amplifiable Mammal mtDNA in Blowfly Guts (Chrysomya megacephala) and a New DNA Mini-Barcode Target
Source: PubMed Central journal article supplement (PMC4405593; doi:10.1371/journal.pone.0123871), 2015-04-21
Supplement: pone.0123871.s003.pdf [file pone.0123871.s003.pdf]

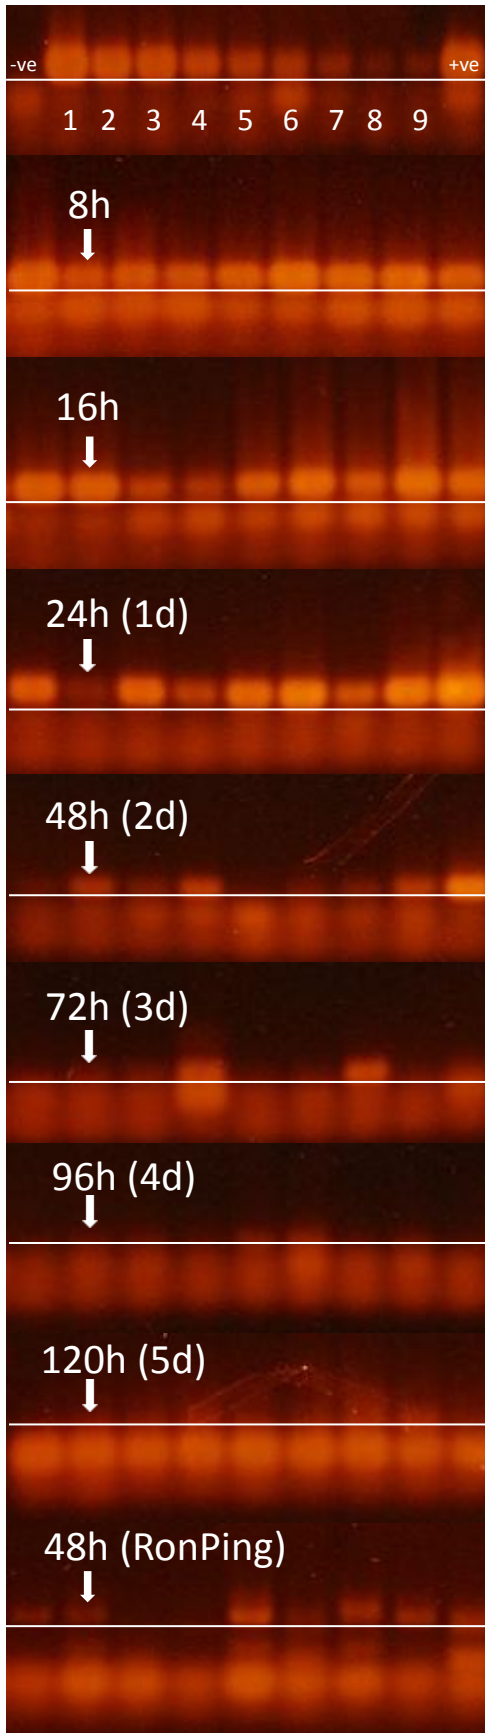

The top row 1-9 shows amplification of beef DNA from mixed blowfly/beef DNA extracts at different concentrations. The amount of beef DNA in the PCR was: 1.25 ng, 0.83 ng, 0.50 ng, 0.28 ng, 0.15 ng, 0.08 ng, 0.04 ng, 0.02 ng and 0.01 ng for 1-9 respectively. The -ve control is DNA extracted from a wild-caught blowfly leg and the +ve control is DNA extracted from beef liver directly. The last row shows amplification using Uni-Mini-bar F/ RonPing primers at 48 h post feeding.
