# Supplementary material for: Reading Mammal Diversity from Flies: The Persistence Period of Amplifiable Mammal mtDNA in Blowfly Guts (Chrysomya megacephala) and a New DNA Mini-Barcode Target
Source: PubMed Central journal article supplement (PMC4405593; doi:10.1371/journal.pone.0123871), 2015-04-21

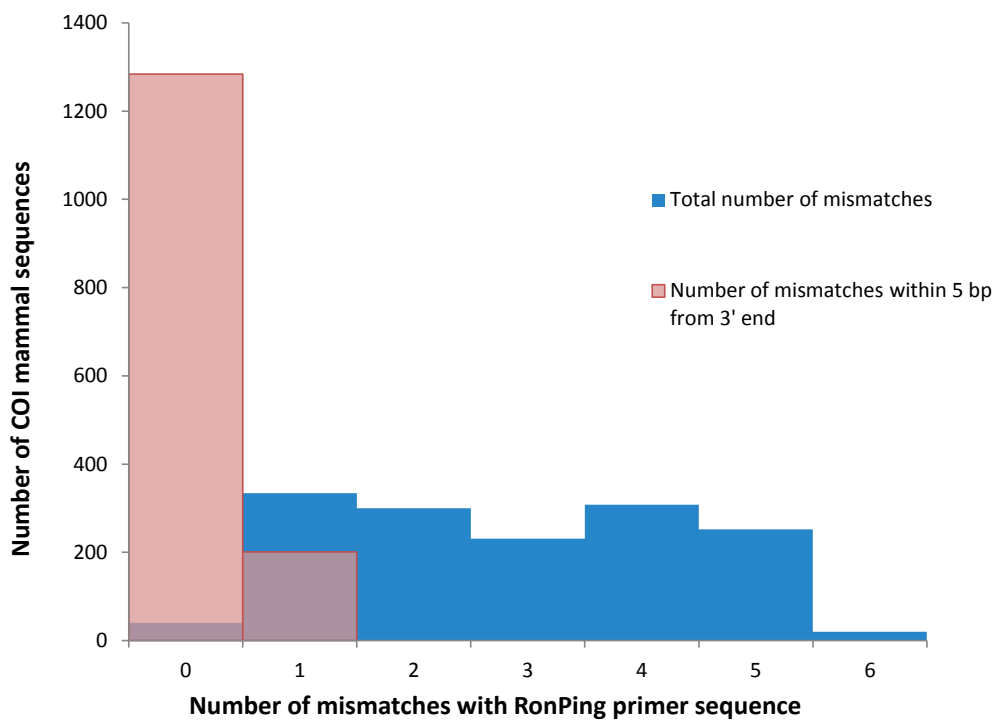

Supplement: pone.0123871.s004.pdf [file pone.0123871.s004.pdf]
