# Supplementary material for: Reading Mammal Diversity from Flies: The Persistence Period of Amplifiable Mammal mtDNA in Blowfly Guts (Chrysomya megacephala) and a New DNA Mini-Barcode Target
Source: PubMed Central journal article supplement (PMC4405593; doi:10.1371/journal.pone.0123871), 2015-04-21

*Balionycteris maculata*

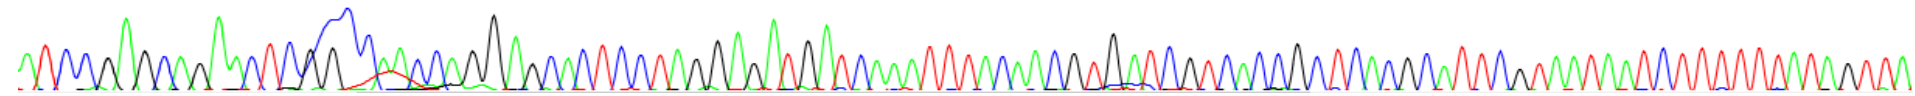

*Bos taurus*

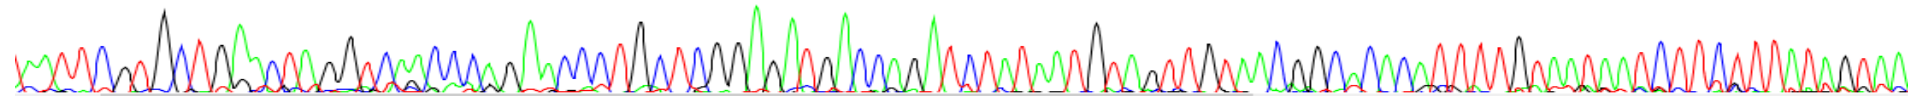

*Chironax melanocephalus*

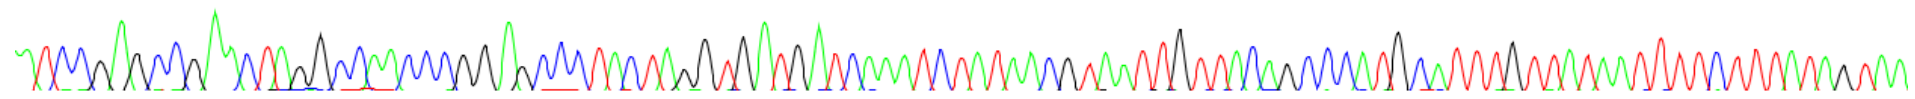

*Cynopterus JLE sp. A*

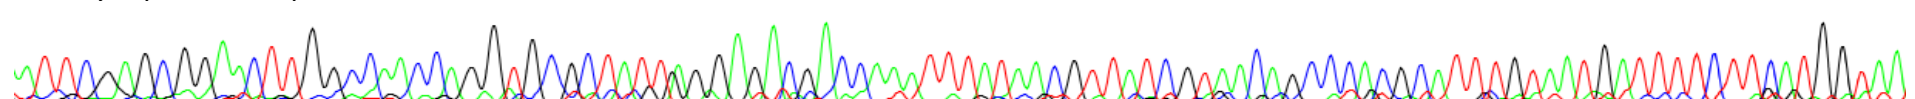

*Glischropus tylopus*

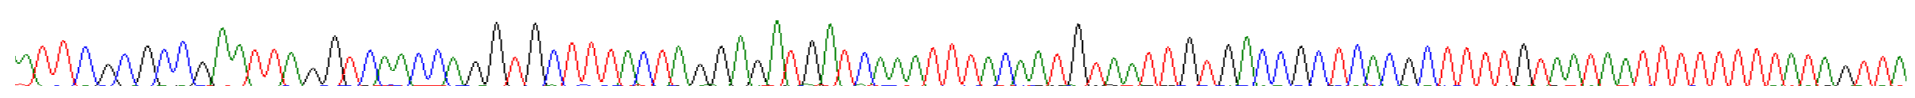

*Kerivoula pellucida*

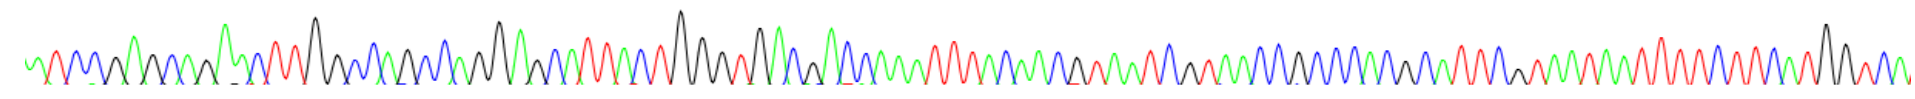

*Megaderma lyra*

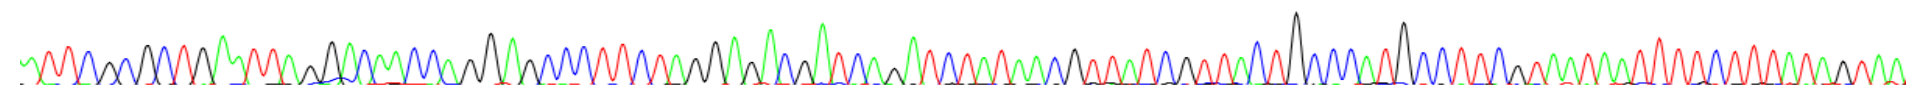

*Rattus andamanensis*

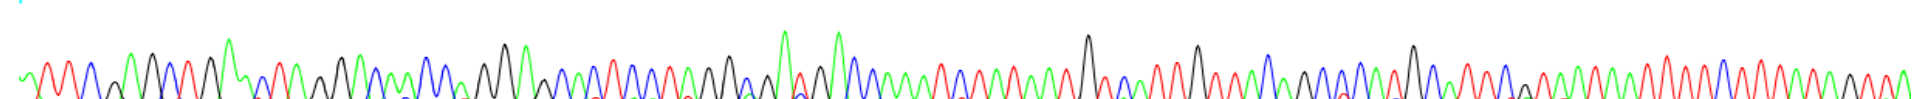

*Rattus tiomanicus*

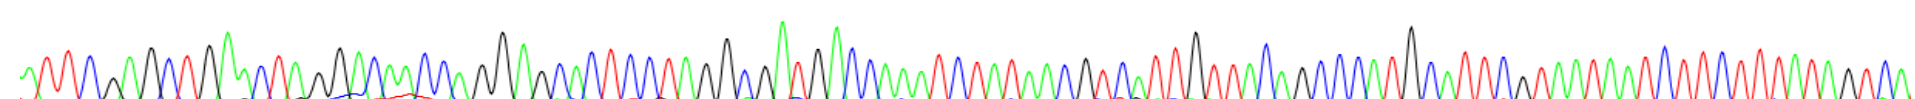

*Sus scrofa*

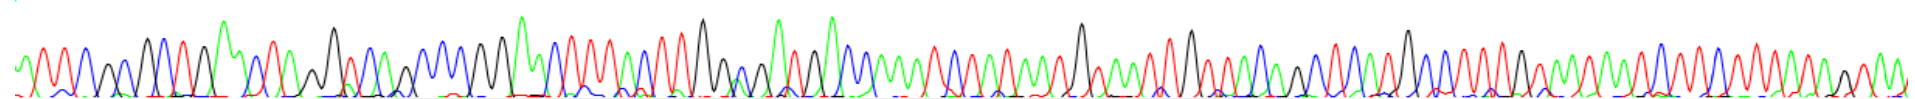

Supplement: pone.0123871.s005.pdf [file pone.0123871.s005.pdf]
